# Supplementary material for: Electron Transfer Flavoprotein (ETF) α Controls Blood Vessel Development by Regulating Endothelial Mitochondrial Bioenergetics and Oxygen Consumption
Source: PubMed Central journal article supplement (PMC8933654; doi:10.1155/2022/7969916), 2022-03-11
Supplement: 7969916.f1.pdf [file 7969916.f1.pdf]

**A**

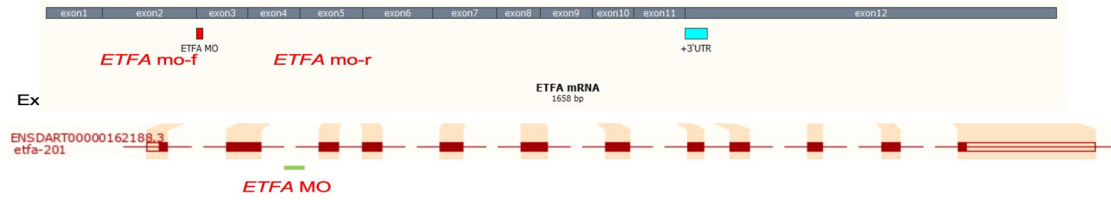

**B**

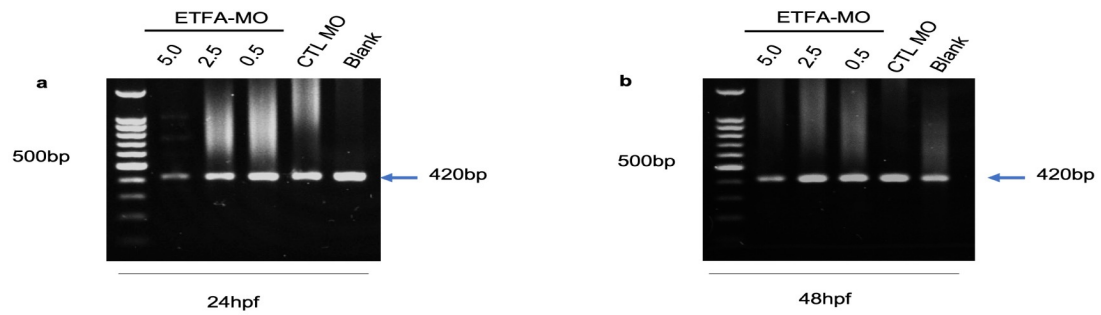

**Figure S1**

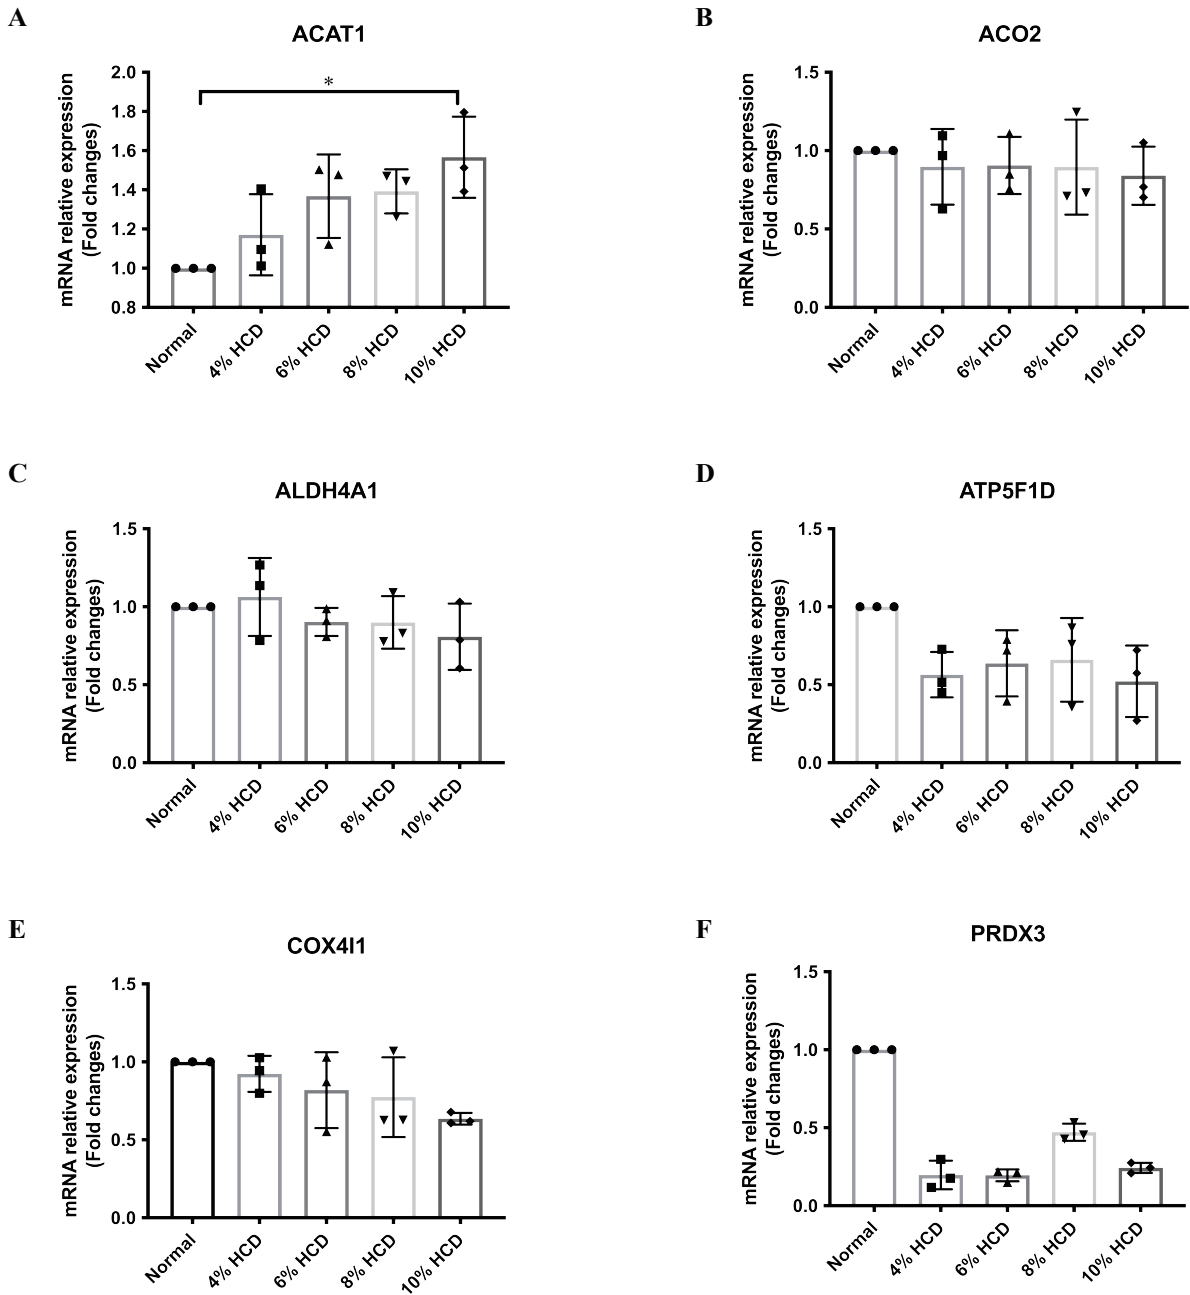

Fig. S2

A

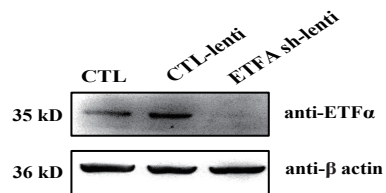

B

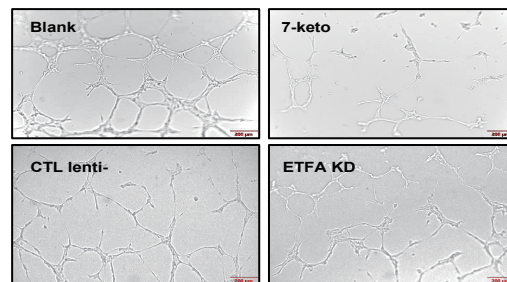

C

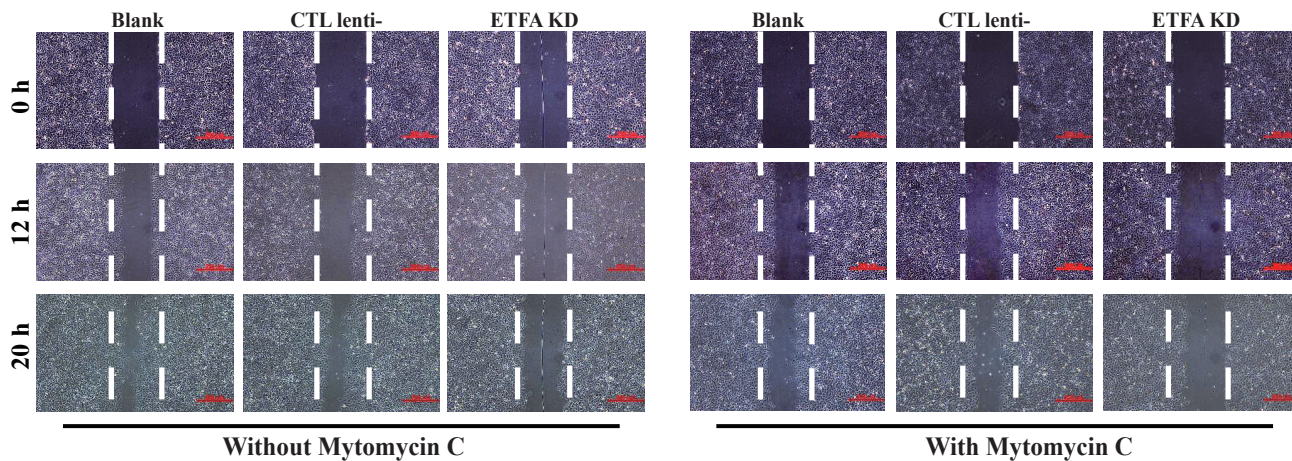

D

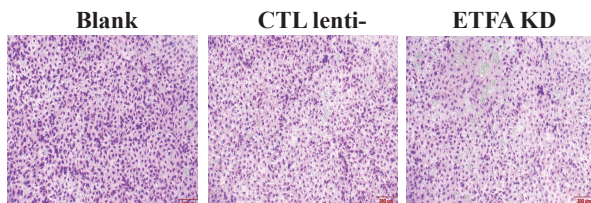

E

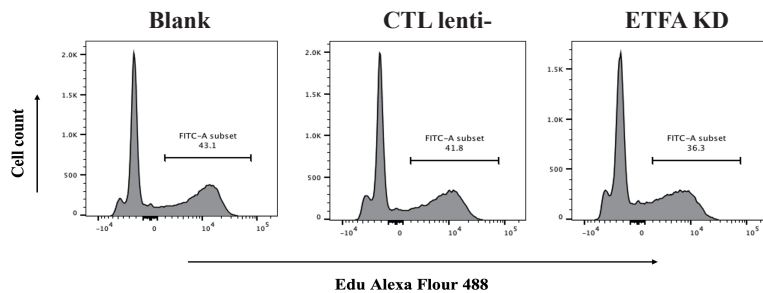

Fig. S3

**A**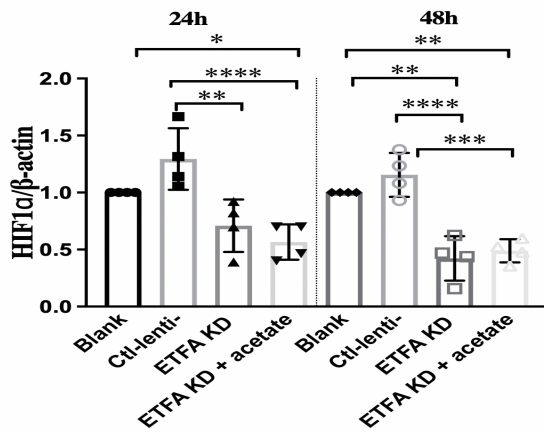**B**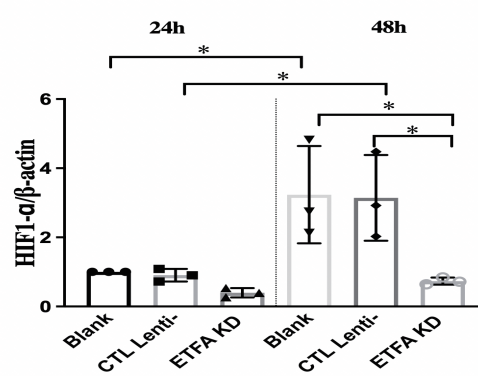**Fig. S4**
