# Supplementary material for: Electron Transfer Flavoprotein (ETF) α Controls Blood Vessel Development by Regulating Endothelial Mitochondrial Bioenergetics and Oxygen Consumption
Source: PubMed Central journal article supplement (PMC8933654; doi:10.1155/2022/7969916), 2022-03-11

Original data of Fig. 5C

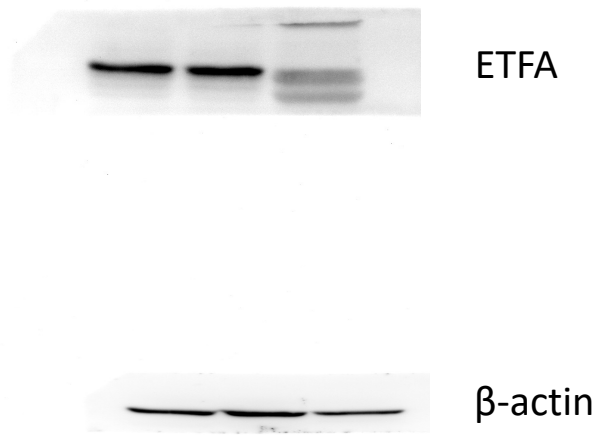

Original data of Fig. 6A

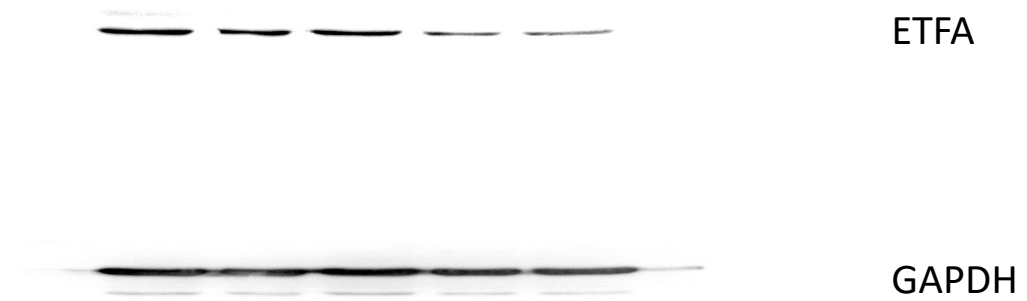

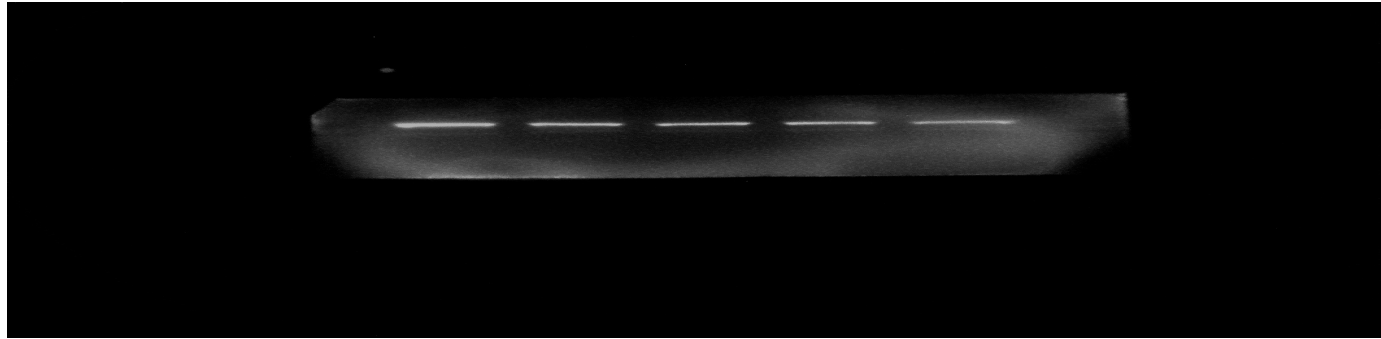

ETFA

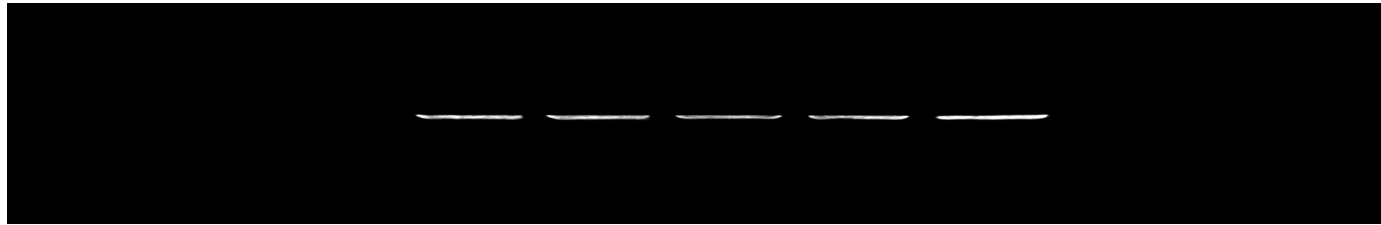

$\beta$ -actin

Original data of Fig. 7E

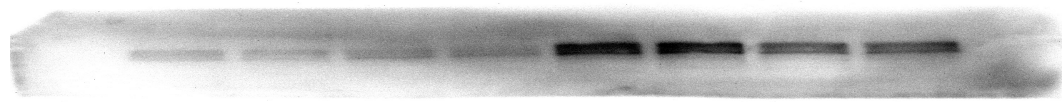

HIF1 $\alpha$

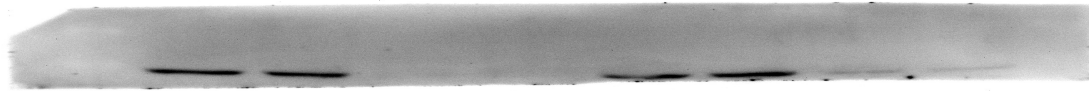

ETFA

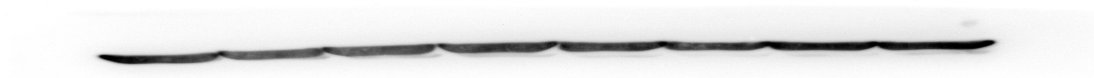

$\beta$ -actin

Original data of Fig. 7G

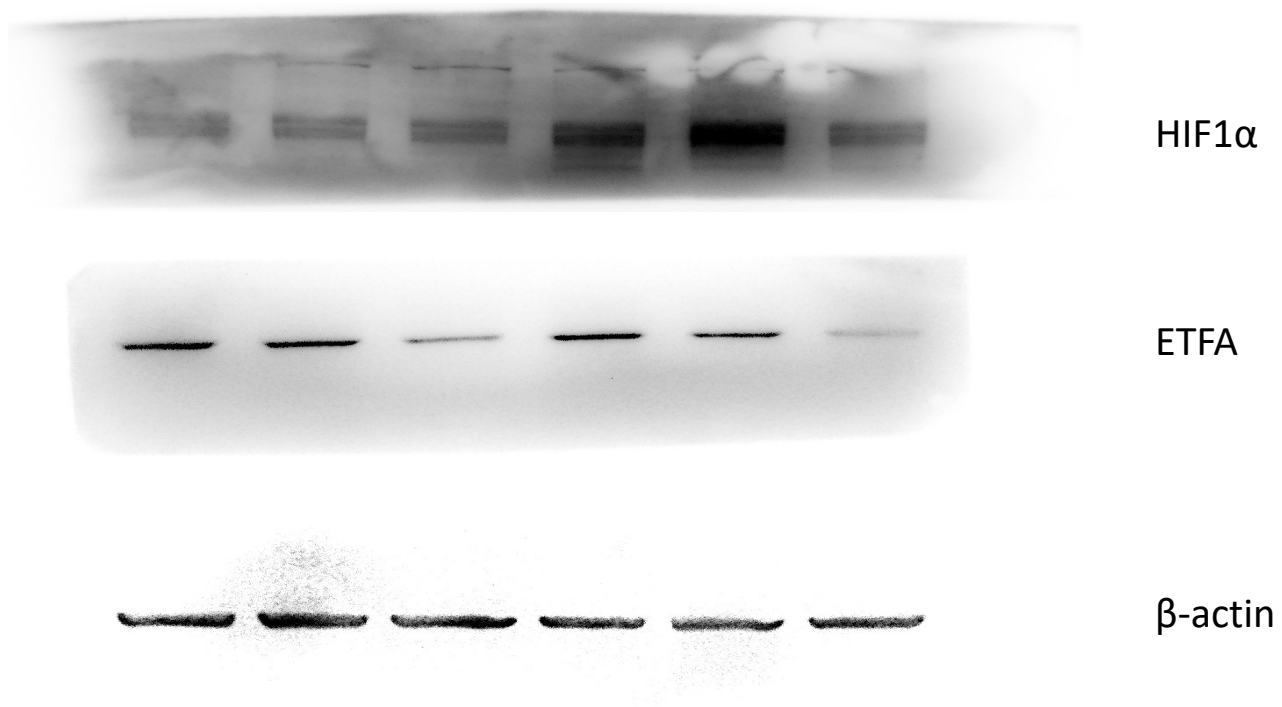

Supplement: 7969916.f2.pdf [file 7969916.f2.pdf]
